# Supplementary material
Source: PubMed Central journal article supplement (PMC7218927)
Supplement: om9b00845_si_001.pdf [file om9b00845_si_001.pdf]

# Ti(IV)-Trisphenolate Catalyst Systems For the Ring-Opening Copolymerization of Cyclohexene Oxide and Carbon Dioxide

Sumesh K. Raman,<sup>a</sup> Arron C. Deacy,<sup>a</sup> Leticia Pena Carrodeguas,<sup>a</sup> Natalia V. Reis,<sup>a</sup> Ryan W.F. Kerr,<sup>a</sup> Andreas Phanopoulos,<sup>a</sup> Sebastian Morton,<sup>a</sup> Matthew G. Davidson<sup>b</sup> and Charlotte K. Williams<sup>a\*</sup>

<sup>a</sup>Department of Chemistry, Chemistry Research Laboratory, 12 Mansfield Rd, Oxford, OX1 3TA

<sup>b</sup>Centre for Sustainable Chemical Technologies, Department of Chemistry, University of Bath, Bath, BA2 7AY, UK

|                                                                                                                                                                                                                                                           |    |
|-----------------------------------------------------------------------------------------------------------------------------------------------------------------------------------------------------------------------------------------------------------|----|
| Figure S1: <sup>1</sup> H NMR spectrum of H <sub>3</sub> L <sup>Me</sup> ligand (400 MHz, C <sub>6</sub> D <sub>6</sub> , 298K) .....                                                                                                                     | 2  |
| Figure S2: <sup>13</sup> C { <sup>1</sup> H} NMR spectrum of H <sub>3</sub> L <sup>Me</sup> ligand (101 MHz, C <sub>6</sub> D <sub>6</sub> , 298K).....                                                                                                   | 2  |
| Figure S3: <sup>1</sup> H NMR spectrum of H <sub>3</sub> L <sup>tBu</sup> ligand (400 MHz, C <sub>6</sub> D <sub>6</sub> , 298K) .....                                                                                                                    | 3  |
| Figure S4: <sup>13</sup> C { <sup>1</sup> H} NMR spectrum of of H <sub>3</sub> L <sup>tBu</sup> ligand (126 MHz, C <sub>6</sub> D <sub>6</sub> , 298K) .....                                                                                              | 3  |
| Figure S5: <sup>1</sup> H NMR spectrum of complex 2 (ATP) <sup>Me</sup> TiO <sup>i</sup> Pr (400 MHz, C <sub>6</sub> D <sub>6</sub> , 298K).....                                                                                                          | 4  |
| Figure S6: <sup>13</sup> C { <sup>1</sup> H} NMR spectrum of complex 2 (ATP) <sup>Me</sup> TiO <sup>i</sup> Pr (126 MHz, C <sub>6</sub> D <sub>6</sub> , 298K) .....                                                                                      | 4  |
| Figure S7: <sup>1</sup> H NMR spectrum of complex 1 (ATP) <sup>tBu</sup> TiO <sup>i</sup> Pr (400 MHz, C <sub>6</sub> D <sub>6</sub> , 298K).....                                                                                                         | 5  |
| Figure S8: <sup>13</sup> C { <sup>1</sup> H} NMR spectrum of complex 1 (ATP) <sup>tBu</sup> TiO <sup>i</sup> Pr (101 MHz, C <sub>6</sub> D <sub>6</sub> , 298K).....                                                                                      | 5  |
| Figure S9: <sup>1</sup> H NMR spectrum of complex 3 (ATP) <sup>Me</sup> TiCl (500 MHz, CDCl <sub>3</sub> , 298K).....                                                                                                                                     | 6  |
| Figure S10: <sup>13</sup> C { <sup>1</sup> H} NMR spectrum of complex 3 (ATP) <sup>Me</sup> TiCl (126 MHz, CDCl <sub>3</sub> , 298K) .....                                                                                                                | 6  |
| Figure S11: <sup>1</sup> H NMR spectrum of dimer (L <sup>Me</sup> Ti) <sub>2</sub> O (400 MHz, C <sub>6</sub> D <sub>6</sub> , 298K) .....                                                                                                                | 7  |
| Figure S12: <sup>13</sup> C { <sup>1</sup> H} NMR spectrum of dimer (L <sup>Me</sup> Ti) <sub>2</sub> O (126 MHz, C <sub>6</sub> D <sub>6</sub> , 298K) .....                                                                                             | 7  |
| Figure S13: Representative <sup>1</sup> H NMR spectrum (400 MHz, C <sub>6</sub> D <sub>6</sub> , 298K) of the crude product from the copolymerisation of CO <sub>2</sub> with CHO at different temperatures. Polyether resonances were not observed. .... | 9  |
| Figure S14: Molecular structure of the product of the reaction between complex 2 and PPh <sub>4</sub> Cl. The hydrogen atoms are not illustrated. Titanium (light blue), Oxygen (red), Nitrogen (Dark blue), Chlorine (Green), Phosphorus (Orange). ....  | 10 |

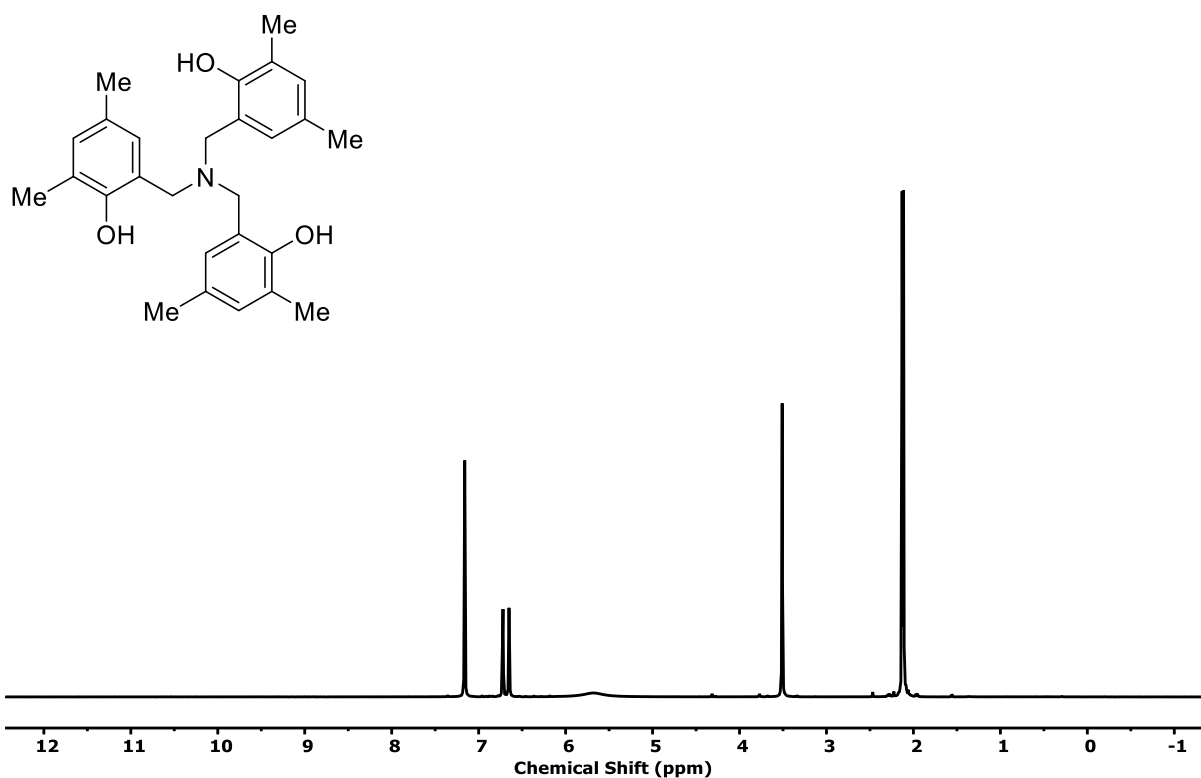

Figure S1:  $^1H$  NMR spectrum of  $H_3L^{Me}$  ligand (400 MHz,  $C_6D_6$ , 298K)

$^1H$  NMR (400 MHz,  $C_6D_6$ , 298K)  $\delta$  (ppm) 6.72 (s, 3H), 6.65 (s, 3H), 5.65 (br s, 3H), 3.51 (s, 6H), 2.13 (s, 9H), 2.11 (s, 9H).

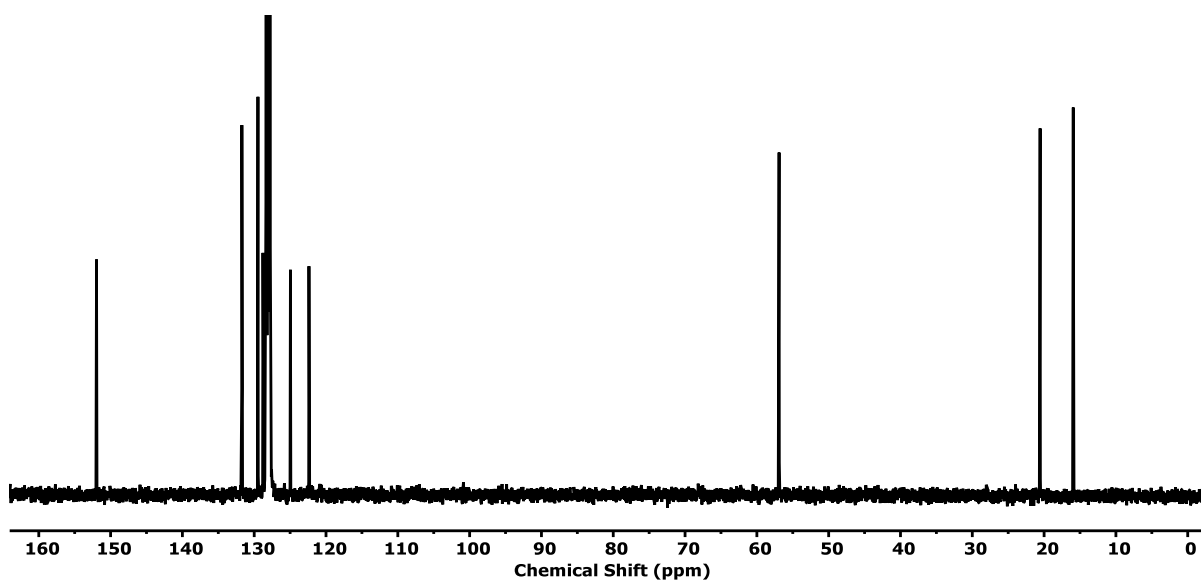

Figure S2:  $^{13}C$  { $^1H$ } NMR spectrum of  $H_3L^{Me}$  ligand (101 MHz,  $C_6D_6$ , 298K)

$^{13}C$  { $^1H$ } NMR (101 MHz,  $C_6D_6$ , 298K)  $\delta$  (ppm) 151.96, 131.72, 129.48, 128.78, 124.96, 122.38, 56.91, 20.56, 15.94.

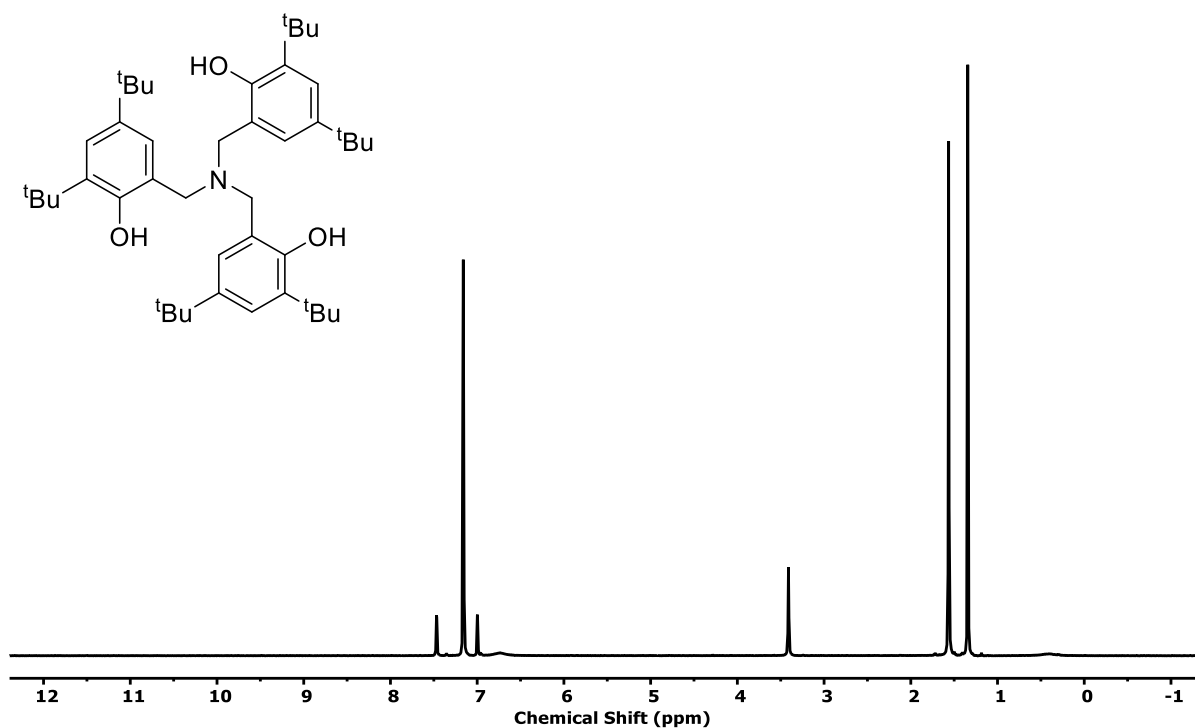

**Figure S3:** <sup>1</sup>H NMR spectrum of H<sub>3</sub>L<sup>tBu</sup> ligand (400 MHz, C<sub>6</sub>D<sub>6</sub>, 298K)

<sup>1</sup>H NMR (400 MHz, C<sub>6</sub>D<sub>6</sub>, 298K) δ (ppm) 7.47 (s, 3H) 7.00 (s, 3H), 6.75 (br s, 3H), 3.41 (s, 6H), 1.56 (s, 27H), 1.34 (s, 27H).

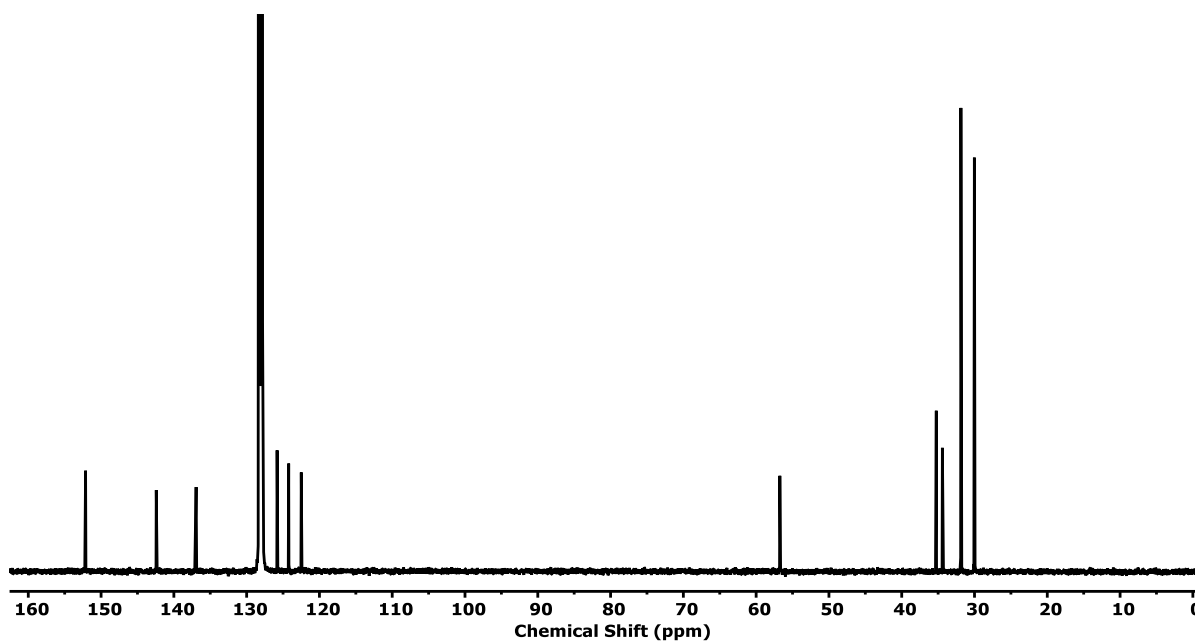

**Figure S4:** <sup>13</sup>C {<sup>1</sup>H} NMR spectrum of H<sub>3</sub>L<sup>tBu</sup> ligand (126 MHz, C<sub>6</sub>D<sub>6</sub>, 298K)

<sup>13</sup>C {<sup>1</sup>H} NMR (126 MHz, C<sub>6</sub>D<sub>6</sub>, 298K) δ (ppm) 152.13, 142.42, 136.94, 125.81, 124.23, 122.49, 56.75, 35.25, 33.41, 31.87, 30.02.

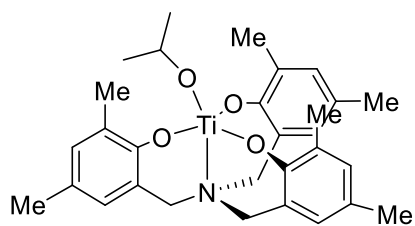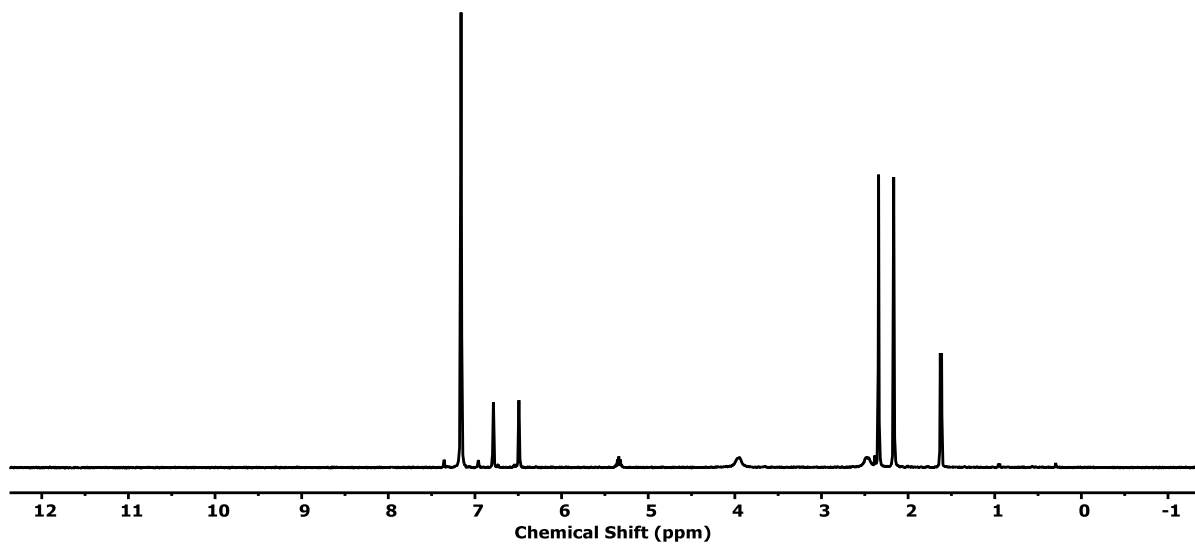

Figure S5:  $^1\text{H}$  NMR spectrum of complex 2 ( $\text{ATP}^{\text{Me}}\text{TiO}^i\text{Pr}$ ) (400 MHz,  $\text{C}_6\text{D}_6$ , 298K)

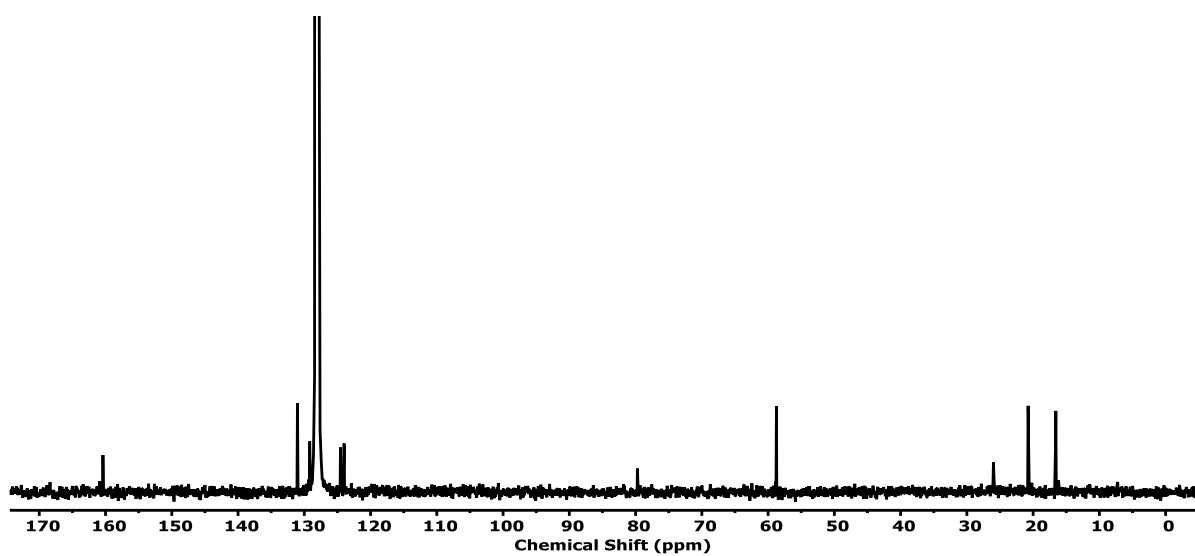

Figure S6:  $^{13}\text{C}$   $\{^1\text{H}\}$  NMR spectrum of complex 2 ( $\text{ATP}^{\text{Me}}\text{TiO}^i\text{Pr}$ ) (126 MHz,  $\text{C}_6\text{D}_6$ , 298K)

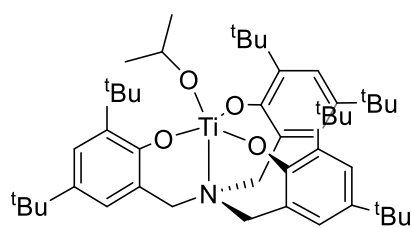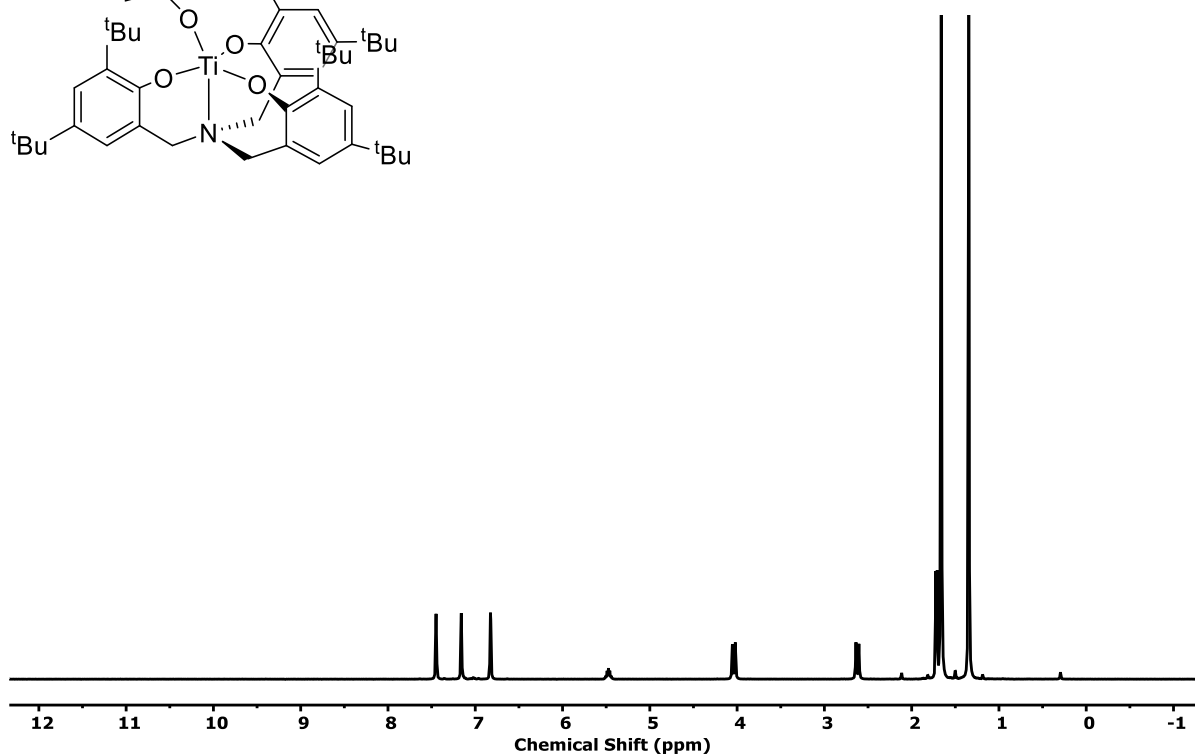

Figure S7:  $^1\text{H}$  NMR spectrum of complex 1 ( $\text{ATP}^{\text{tBu}}\text{Ti}^{\text{oPr}}$ ) (400 MHz,  $\text{C}_6\text{D}_6$ , 298K)

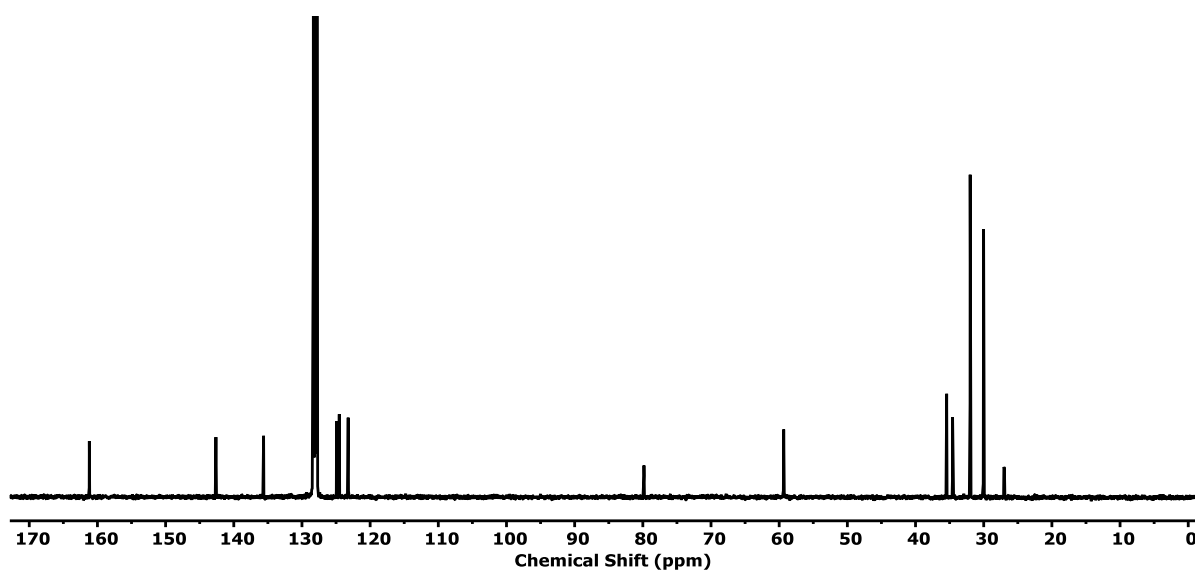

Figure S8:  $^{13}\text{C}$   $\{^1\text{H}\}$  NMR spectrum of complex 1 ( $\text{ATP}^{\text{tBu}}\text{Ti}^{\text{oPr}}$ ) (101 MHz,  $\text{C}_6\text{D}_6$ , 298K)

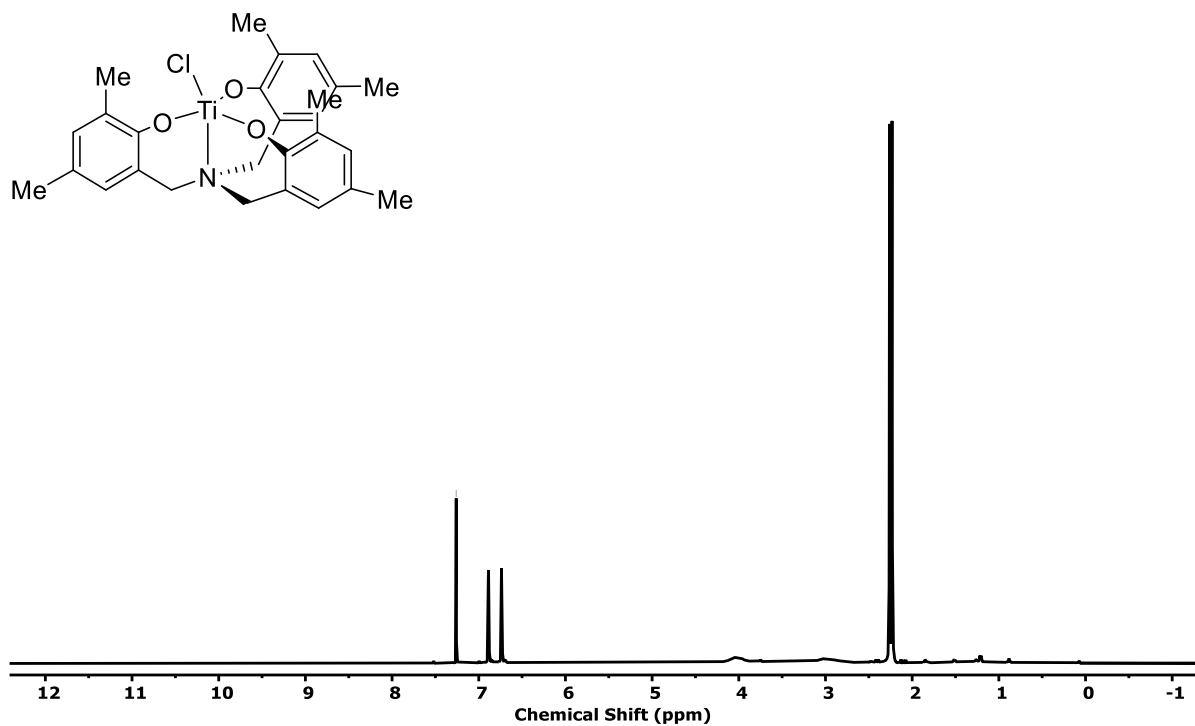

Figure S9: <sup>1</sup>H NMR spectrum of complex 3 (ATP)<sup>Me</sup>TiCl (500 MHz, CDCl<sub>3</sub>, 298K)

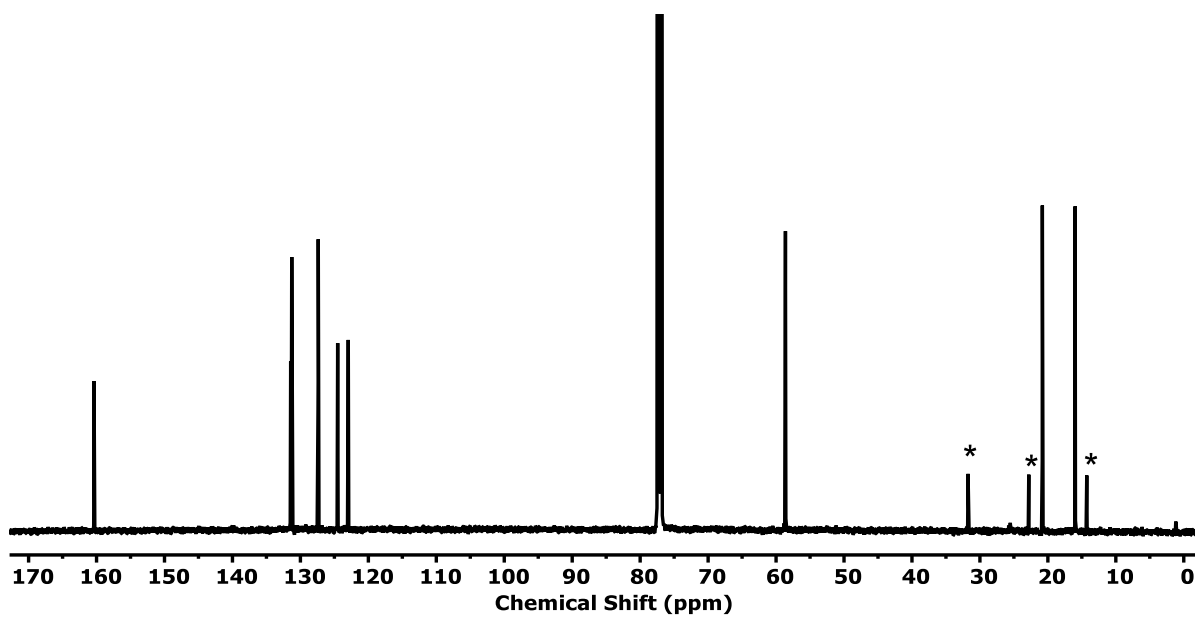

Figure S10: <sup>13</sup>C {<sup>1</sup>H} NMR spectrum of complex 3 (ATP)<sup>Me</sup>TiCl (126 MHz, CDCl<sub>3</sub>, 298K)

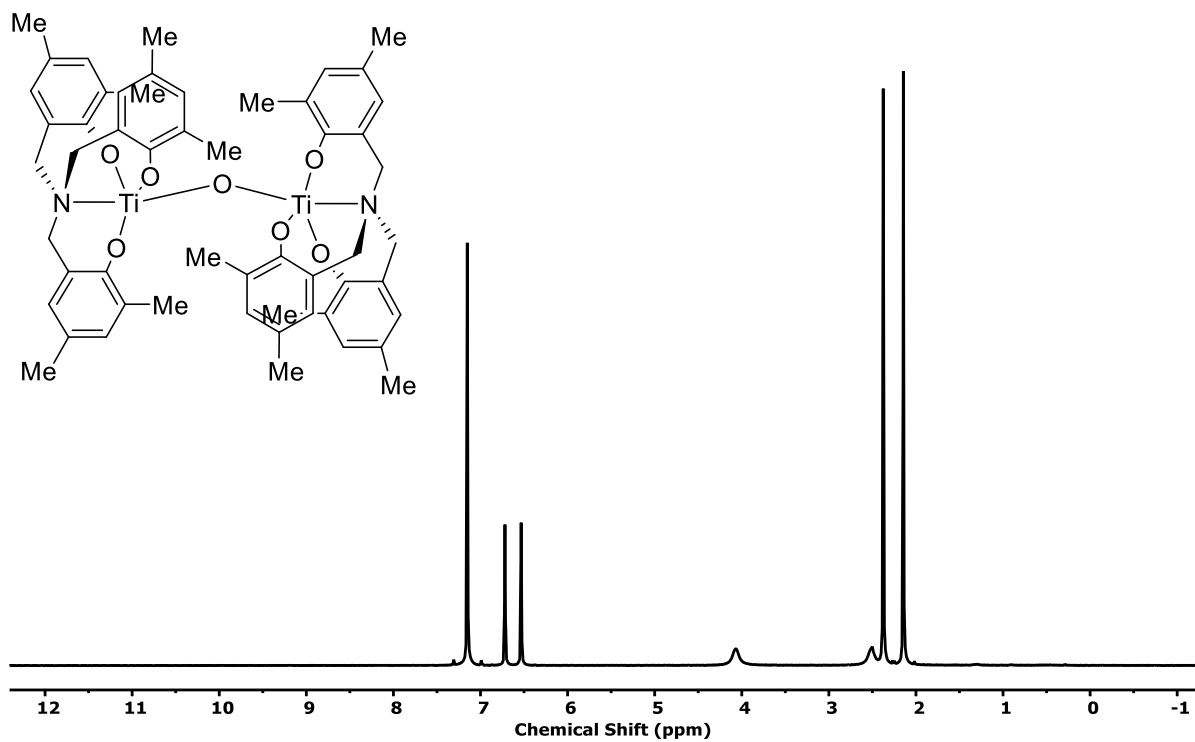

Figure S11:  $^1H$  NMR spectrum of dimer  $(L^{Me}Ti)_2O$  (400 MHz,  $C_6D_6$ , 298K)

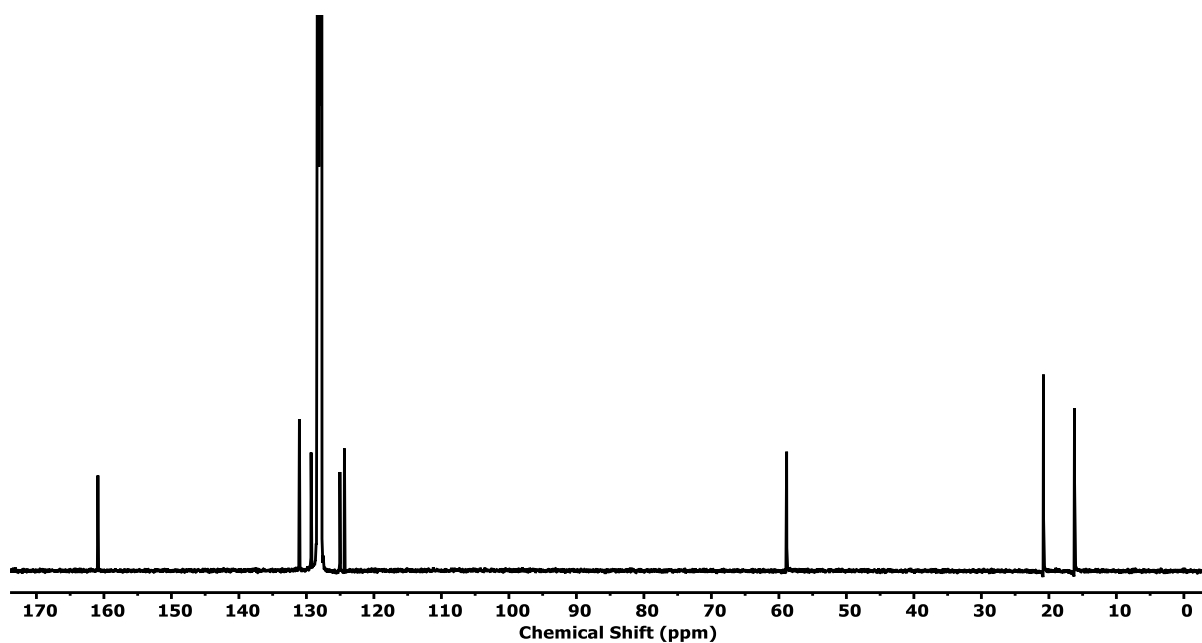

Figure S12:  $^{13}C$   $\{^1H\}$  NMR spectrum of dimer  $(L^{Me}Ti)_2O$  (126 MHz,  $C_6D_6$ , 298K)

**Table S1. ROCOP of CO<sub>2</sub> and CHO with catalyst precursors.**

| Entry          | Cat                   | Cocat | Conv. (%) | PCHC(%) | CC(%) | Polyether(%) |
|----------------|-----------------------|-------|-----------|---------|-------|--------------|
| 1 <sup>a</sup> | Ti(OiPr) <sub>4</sub> | -     | 8         | <1      | <1    | >99          |
| 2 <sup>b</sup> | Ti(OiPr) <sub>4</sub> | PPNCl | 18        | <1      | <1    | >99          |
| 3 <sup>c</sup> | -                     | PPNCl | 14        | <1      | >99   | <1           |

Conditions: 80 °C, CO<sub>2</sub> = 40 bar, time = 16 h. <sup>a</sup>[cat]/[cocat]/[CHO] = 1/0/2000,

<sup>b</sup>[cat]/[cocat]/[CHO] = 1/1/2000, <sup>c</sup>[cat]/[cocat]/[CHO] = 0/1/2000.

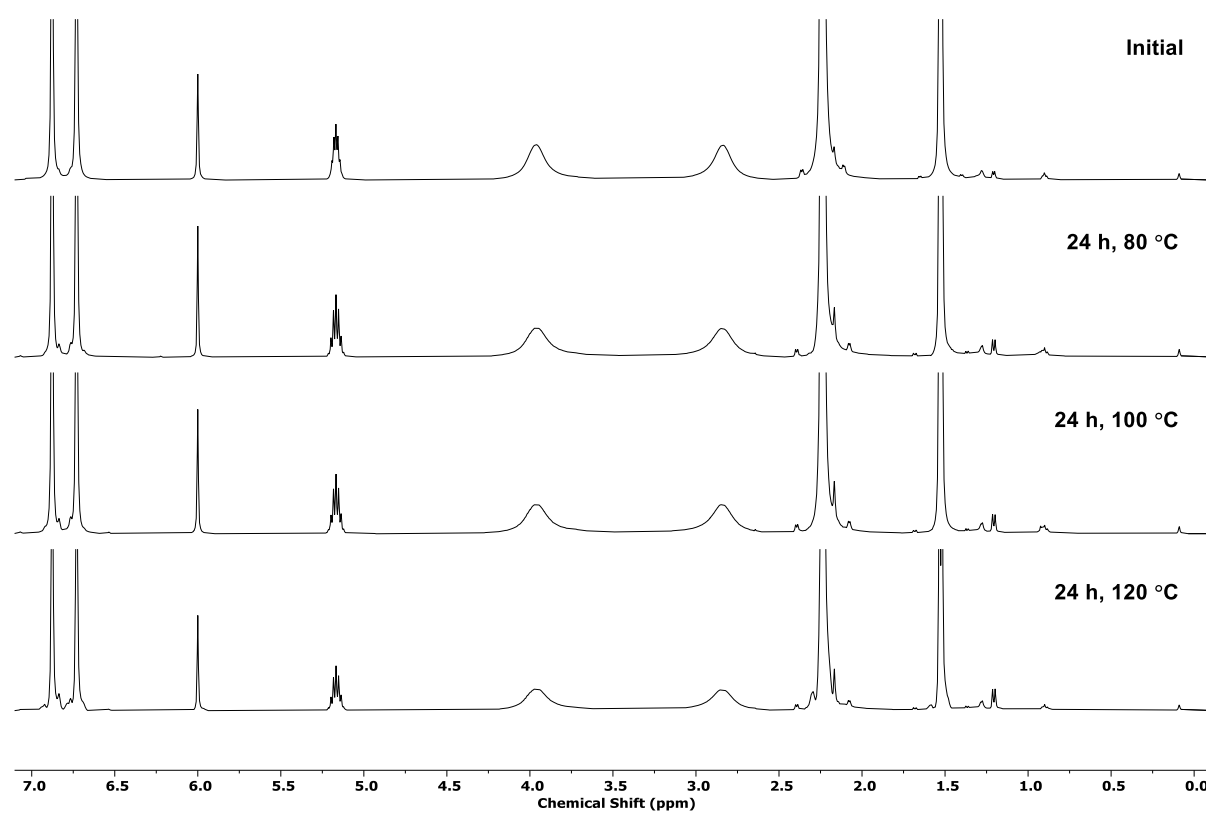

**Figure S13: Stacked <sup>1</sup>H NMR Spectra of complex 2 heated for 24 h at temperatures ranging 80-120 °C. (*d*<sub>2</sub>-tetrachloroethane)**



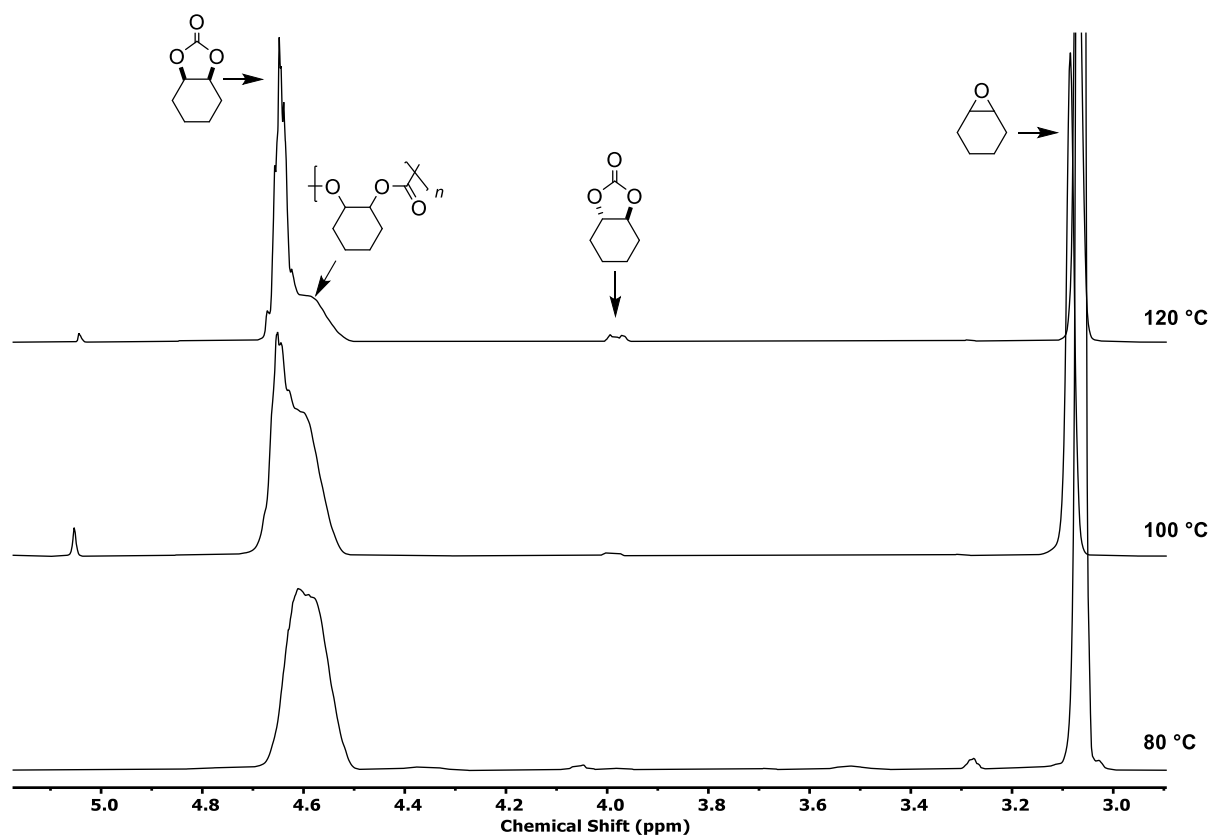

**Figure S14: Representative <sup>1</sup>H NMR spectrum (400 MHz, C<sub>6</sub>D<sub>6</sub>, 298K) of the crude product from the copolymerisation of CO<sub>2</sub> with CHO at different temperatures. Polyether resonances were not observed.**

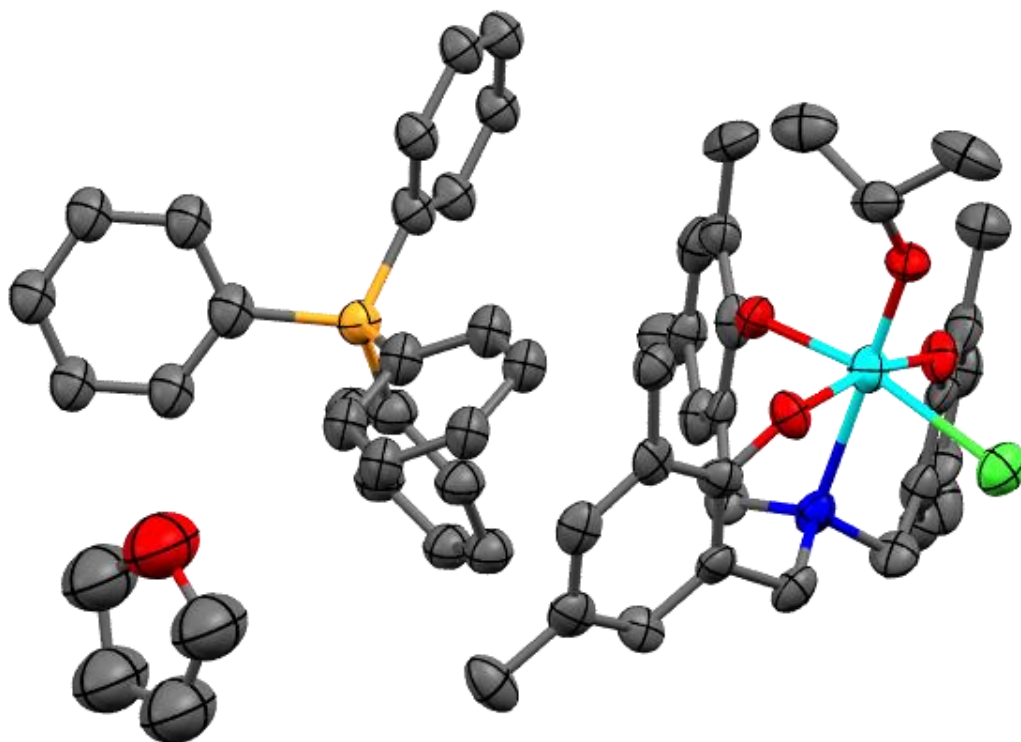

**Figure S15: Molecular structure of the product of the reaction between complex 2 and PPh<sub>4</sub>Cl. The hydrogen atoms are not illustrated. Titanium (light blue), Oxygen (red), Nitrogen (Dark blue), Chlorine (Green), Phosphorus (Orange).**

The molecular structure of **2.PPh<sub>4</sub>Cl** was solved using SHELXT<sup>1</sup> and least-square refined using SHELXL<sup>2</sup> in Olex2.<sup>3</sup> This structure is included as connectivity only and therefore bond lengths should not be considered as accurate. Hydrogen atoms were treated by constrained refinement. Displacement parameters were added using the EADP command for the PPh<sub>4</sub> counter ion and one highly disordered solvent molecule of THF. In addition 81.6 electrons were excluded from the lattice using the Olex solvent mask feature,<sup>4</sup> which was believed to be two highly disordered THF molecules.

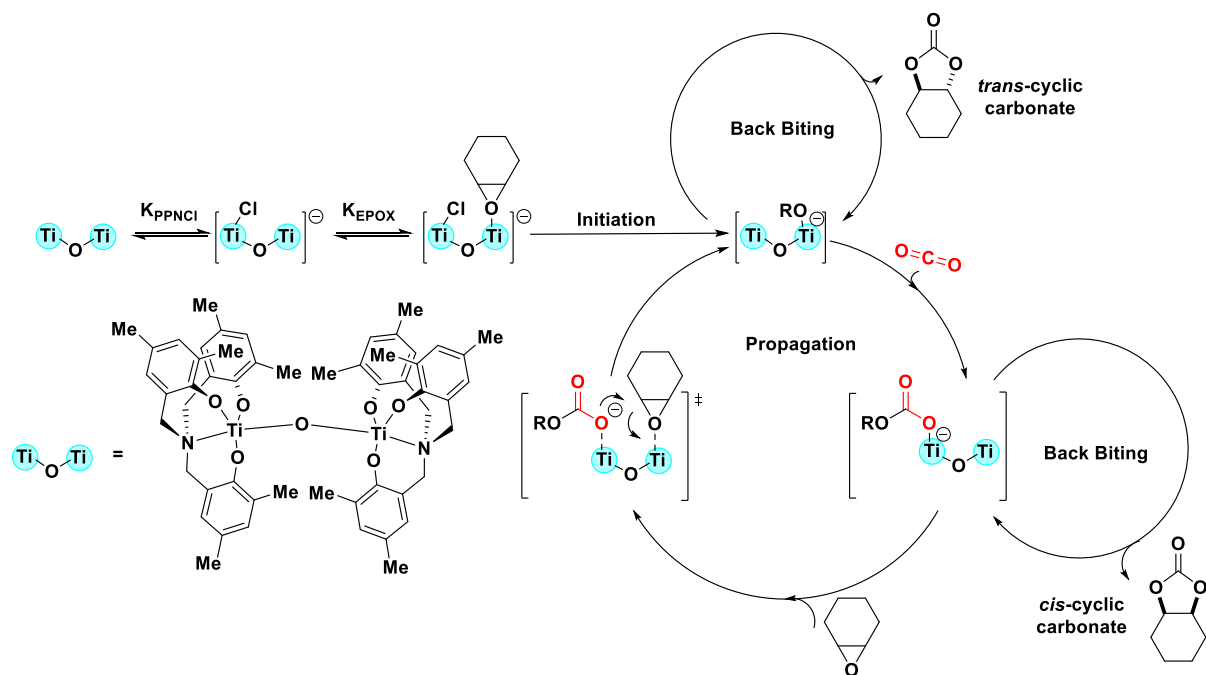

Figure S16: Illustrates a possible catalytic cycle, involving the Ti(IV) dimer complex (4) to rationalize the formation of PCHC and cyclic carbonates.

**Table S2: Experimental details**

|                                                                                                                |                                                                                                                                                                                                                                 |
|----------------------------------------------------------------------------------------------------------------|---------------------------------------------------------------------------------------------------------------------------------------------------------------------------------------------------------------------------------|
| Local code                                                                                                     | 002rwwk19                                                                                                                                                                                                                       |
| Chemical formula                                                                                               | C <sub>30</sub> H <sub>37</sub> ClNO <sub>4</sub> Ti·C <sub>24</sub> H <sub>20</sub> P·C <sub>4</sub> H <sub>8</sub> O                                                                                                          |
| <i>M<sub>r</sub></i>                                                                                           | 970.43                                                                                                                                                                                                                          |
| Crystal system, space group                                                                                    | Monoclinic, <i>P2<sub>1</sub></i>                                                                                                                                                                                               |
| Temperature (K)                                                                                                | 150                                                                                                                                                                                                                             |
| <i>a</i> , <i>b</i> , <i>c</i> (Å)                                                                             | 11.7978 (4), 20.5515 (5), 12.6554 (4)                                                                                                                                                                                           |
| β (°)                                                                                                          | 115.944 (4)                                                                                                                                                                                                                     |
| <i>V</i> (Å <sup>3</sup> )                                                                                     | 2759.23 (17)                                                                                                                                                                                                                    |
| <i>Z</i>                                                                                                       | 2                                                                                                                                                                                                                               |
| Radiation type                                                                                                 | Cu Kα                                                                                                                                                                                                                           |
| μ (mm <sup>-1</sup> )                                                                                          | 2.39                                                                                                                                                                                                                            |
| Crystal size (mm)                                                                                              | 0.137 × 0.090 × 0.018                                                                                                                                                                                                           |
| Diffractometer                                                                                                 | SuperNova, Dual, Cu at home/near, Atlas                                                                                                                                                                                         |
| Absorption correction                                                                                          | Multi-scan<br><i>CrysAlis PRO</i> 1.171.39.46 (Rigaku Oxford Diffraction, 2018) Empirical absorption correction using spherical harmonics, implemented in SCALE3 ABSPACK scaling algorithm.                                     |
| <i>T<sub>min</sub></i> , <i>T<sub>max</sub></i>                                                                | 0.867, 1.000                                                                                                                                                                                                                    |
| No. of measured, independent and observed [ <i>I</i> > 2σ( <i>I</i> )] reflections                             | 11705, 5557, 4162                                                                                                                                                                                                               |
| <i>R<sub>int</sub></i>                                                                                         | 0.060                                                                                                                                                                                                                           |
| θ <sub>max</sub> (°)                                                                                           | 51.8                                                                                                                                                                                                                            |
| (sin θ/λ) <sub>max</sub> (Å <sup>-1</sup> )                                                                    | 0.510                                                                                                                                                                                                                           |
| <i>R</i> [ <i>F</i> <sup>2</sup> > 2σ( <i>F</i> <sup>2</sup> )], <i>wR</i> ( <i>F</i> <sup>2</sup> ), <i>S</i> | 0.072, 0.189, 1.02                                                                                                                                                                                                              |
| No. of reflections                                                                                             | 5557                                                                                                                                                                                                                            |
| No. of parameters                                                                                              | 459                                                                                                                                                                                                                             |
| No. of restraints                                                                                              | 1                                                                                                                                                                                                                               |
| H-atom treatment                                                                                               | H-atom parameters constrained                                                                                                                                                                                                   |
| Δρ <sub>max</sub> , Δρ <sub>min</sub> (e Å <sup>-3</sup> )                                                     | 0.52, -0.70                                                                                                                                                                                                                     |
| Absolute structure                                                                                             | Flack <i>x</i> determined using 1287 quotients [( <i>I</i> <sup>+</sup> )-( <i>I</i> <sup>-</sup> )]/[( <i>I</i> <sup>+</sup> )+( <i>I</i> <sup>-</sup> )] (Parsons, Flack and Wagner, <i>Acta Cryst. B</i> 69 (2013) 249-259). |
| Absolute structure parameter                                                                                   | -0.032 (10)                                                                                                                                                                                                                     |

Computer programs: *CrysAlis PRO* 1.171.39.46 (Rigaku OD, 2018), *SHELXT* (Sheldrick, 2015), *SHELXL* (Sheldrick, 2015), *Olex2* (Dolomanov et al., 2009).

1. G. Sheldrick., *SHELXT* – Integrated Space-Group And Crystal-Structure Determination. *Acta Cryst. A*, **2015**, 71, 3-8.
2. G. Sheldrick., Crystal Structure Refinement With *SHELXL*. *Acta Cryst. C*, **2015**, 71, 3-8.
3. O. V. Dolomanov, L. J. Bourhis, R. J. Gildea, J. A. K. Howard and H. Puschmann., *OLEX2*: A Complete Structure Solution, Refinement And Analysis Program. *J. Appl. Crystallogr.*, **2009**, 42, 339-341.
4. A. Spek., *PLATON SQUEEZE*: A Tool For The Calculation Of The Disordered Solvent Contribution To The Calculated Structure Factors. *Acta Cryst. C*. **2015**, 71, 9-18.
